# Supplementary material for: Effect of nutrition education by health professionals on pregnancy-specific nutrition knowledge and healthy dietary practice among pregnant women in Asmara, Eritrea: a quasi-experimental study
Source: HighWire-hosted journal article supplement (doi:10.1136/bmjnph-2020-000159), 2021-04-15
Supplement: bmjnph-2020-000159supp001_data_supplement.pdf [file bmjnph-2020-000159supp001_data_supplement.pdf]

**Table 1: Geographical location of the health facilities**

---

| <b>Northern West Asmara</b>   | <b>Northern East Asmara</b>    |
|-------------------------------|--------------------------------|
| Hazhaz Health Station         | Lasale Health Station          |
| Mai Temenai Health Station    | Geza Banda Health Center       |
| Dirfo Health Station          |                                |
| Semenawi Asmara Health Center |                                |
| <b>Southern West Asmara</b>   | <b>Southern East Asmara</b>    |
| Godaif Community Hospital     | Akria Health Center            |
| Godaif Health Station         | Edaga Hamus Community Hospital |
| Felegehiwet Health Station    | Geza Kenisha Health Station    |
| Freselam Health Station       | Arbaete Asmara Health Station  |
| Denden Health Station         |                                |
| Sembel Health Station         |                                |
| Bet Mekae Community Hospital  |                                |

---
