# Supplementary material for: Effect of nutrition education by health professionals on pregnancy-specific nutrition knowledge and healthy dietary practice among pregnant women in Asmara, Eritrea: a quasi-experimental study
Source: HighWire-hosted journal article supplement (doi:10.1136/bmjnph-2020-000159), 2021-04-15
Supplement: bmjnph-2020-000159supp002_data_supplement.pdf [file bmjnph-2020-000159supp002_data_supplement.pdf]

**Table 2: Sample allocation of pregnant women in the health facilities.**

| <b>Name of health facility</b> | <b>ANC clients seen in August 2017</b> | <b>Sample size</b> |
|--------------------------------|----------------------------------------|--------------------|
| Edaga Hamus Community Hospital | 140                                    | 65                 |
| Bet Mekae Community Hospital   | 59                                     | 27                 |
| Godaif Health Station          | 96                                     | 44                 |
| Geza Banda Health Center       | 73                                     | 33                 |
| Semenawi Asmara Health Center  | 113                                    | 51                 |
| <b>Total</b>                   | <b>481</b>                             | <b>220</b>         |
