# Supplementary material for: Effect of nutrition education by health professionals on pregnancy-specific nutrition knowledge and healthy dietary practice among pregnant women in Asmara, Eritrea: a quasi-experimental study
Source: HighWire-hosted journal article supplement (doi:10.1136/bmjnph-2020-000159), 2021-04-15
Supplement: bmjnph-2020-000159supp005_data_supplement.pdf [file bmjnph-2020-000159supp005_data_supplement.pdf]

## Study protocol

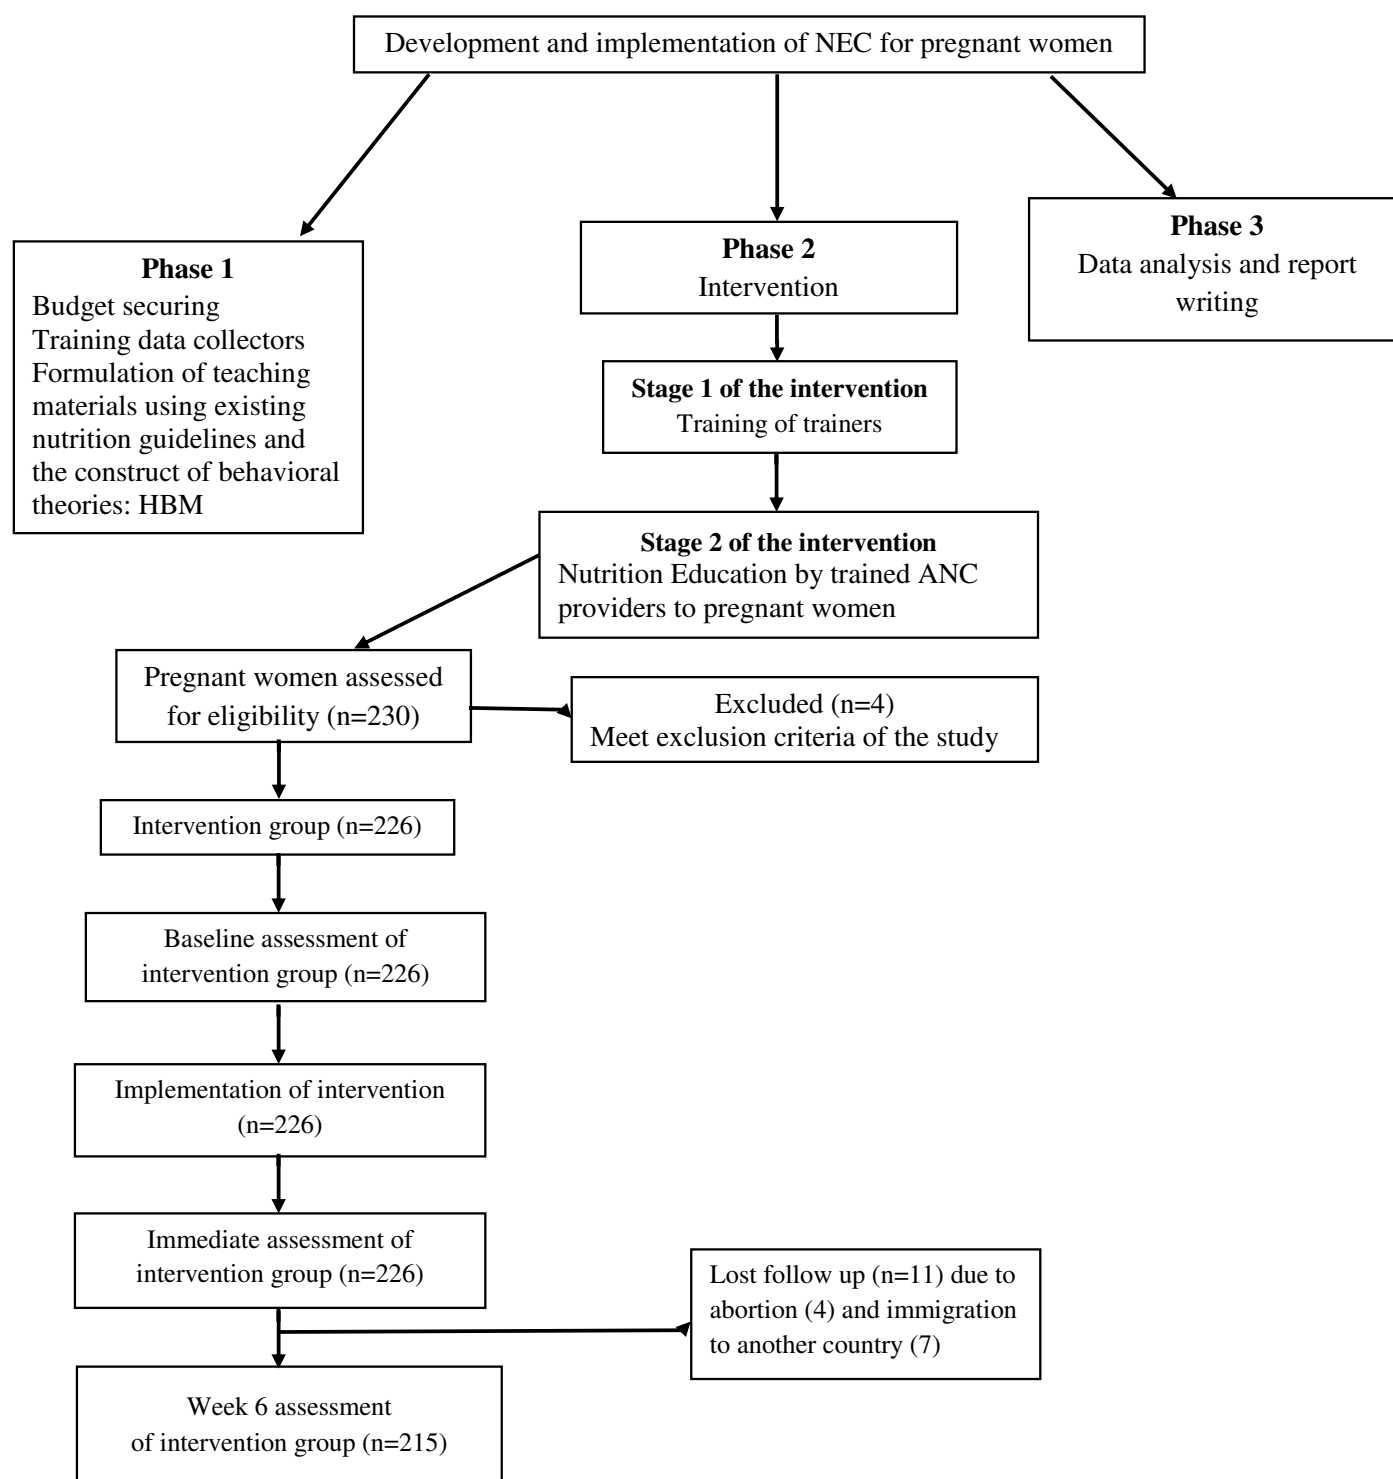

Key: ANC-Antenatal Care  
HBM-Health Belief Model  
NEC-Nutrition Education Counseling
